# Supplementary material
Source: PubMed Central journal article supplement (PMC6310131)
Supplement: NIHMS997305-supplement-ESI.pdf [file NIHMS997305-supplement-ESI.pdf]

Electronic Supplementary Information for “Nucleation and growth of gold nanoparticles initiated by nanosecond and femtosecond laser irradiation of aqueous  $[\text{AuCl}_4]^-$ ”

Collin J. Rodrigues,<sup>‡</sup> Julian A. Bobb,<sup>‡</sup> Mallory G. John, Sergey P. Fisenko,  
M. Samy El-Shall,\* and Katharine Moore Tibbetts\*

\*: [mshelshal@vcu.edu](mailto:mshelshal@vcu.edu); [kmtibbetts@vcu.edu](mailto:kmtibbetts@vcu.edu)

‡: Denotes equal contributions

AuNPs from 100 mJ ns pulses

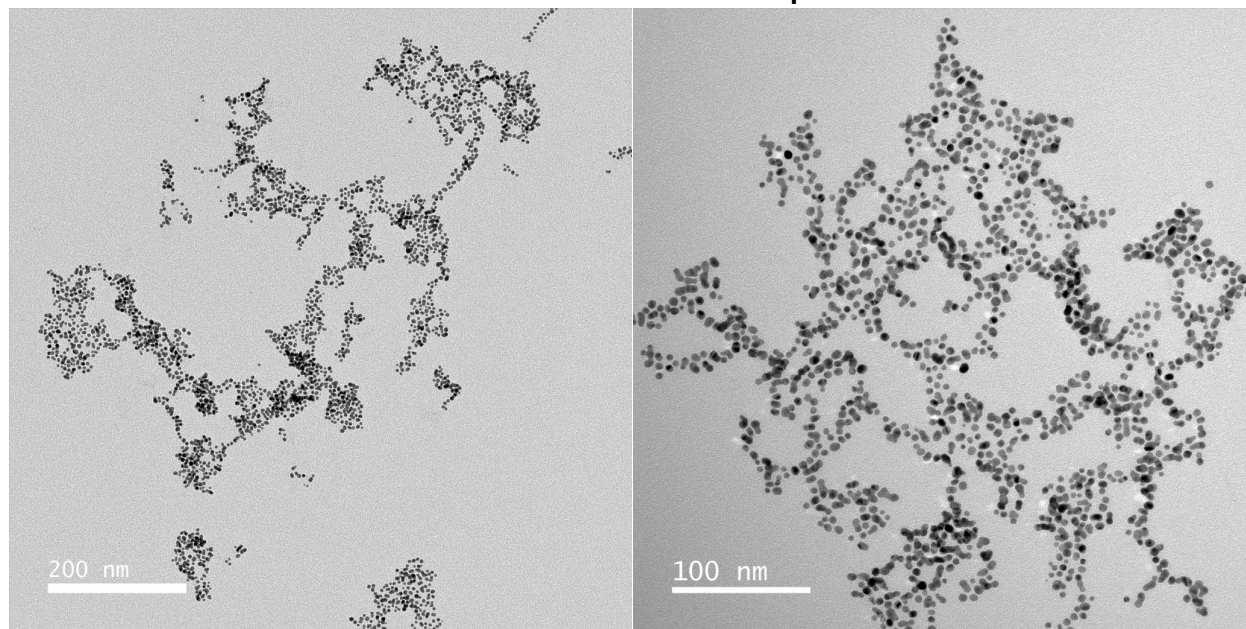

Figure S1: TEM images of AuNPs synthesized with 100 mJ ns laser pulses.

### AuNPs from 67 mJ ns pulses

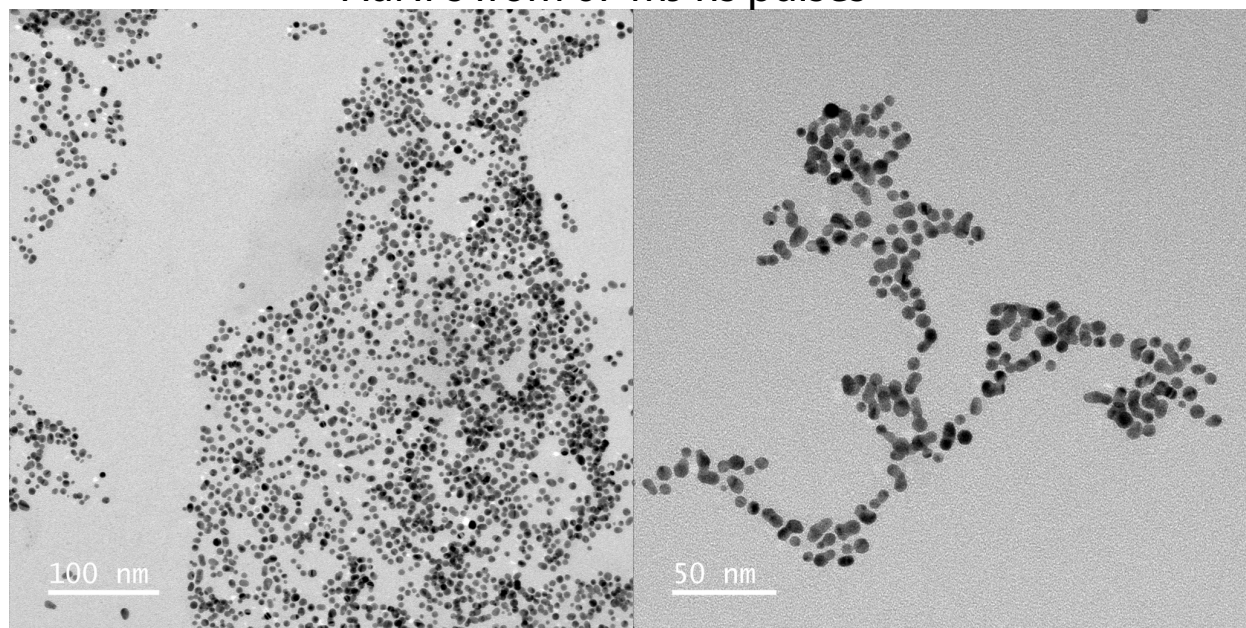

Figure S2: TEM images of AuNPs synthesized with 67 mJ ns laser pulses.

### Citrate-AuNPs after ns laser irradiation

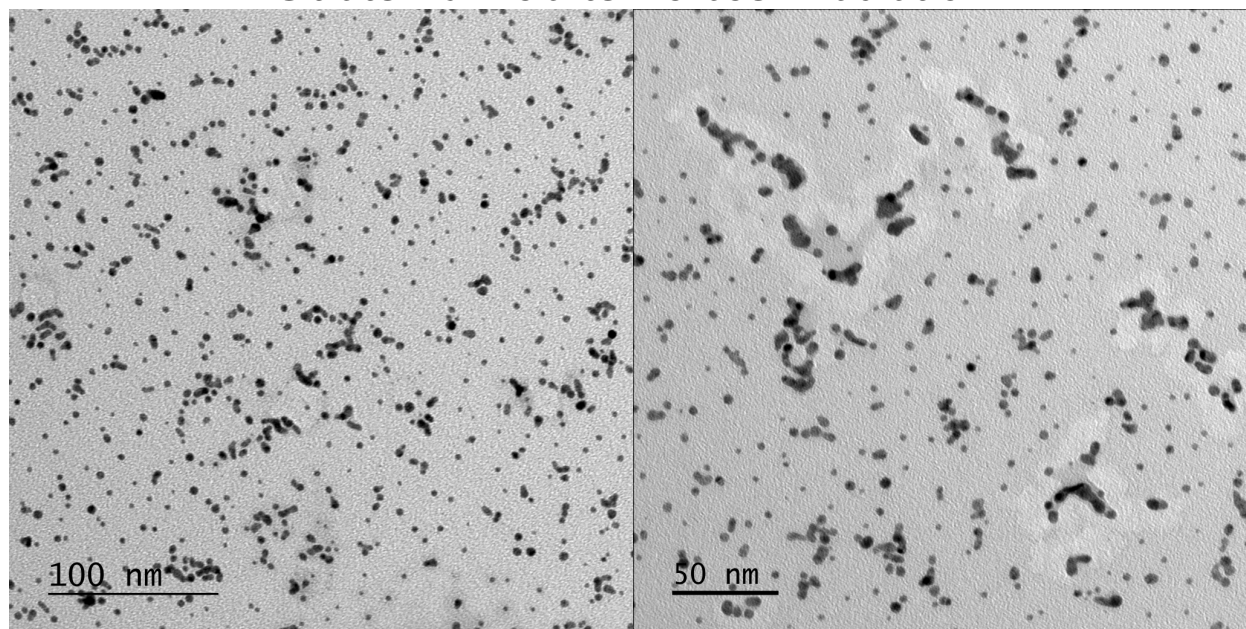

Figure S3: TEM images of citrate-AuNPs irradiated with ns laser pulses.

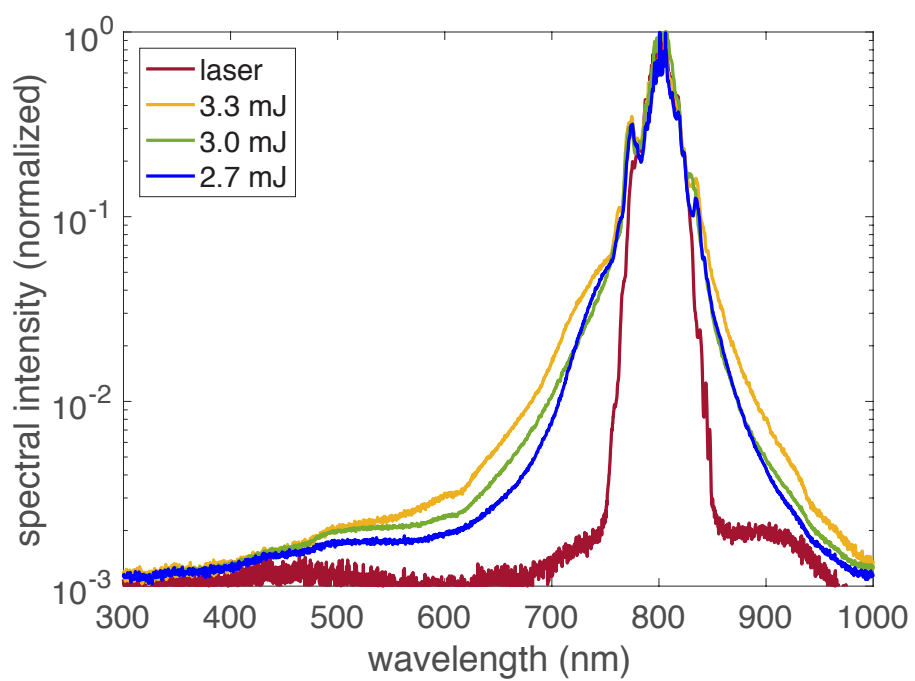

Figure S4: Supercontinuum emission spectra for fs pulses at various powers
